# Supplementary material for: Counseling in Vape Shops: A Survey of Vape Shop Managers in Switzerland
Source: MDPI journal article supplement (doi:10.3390/ijerph182010861), 2021-10-15
Supplement: s1 [file s1]

## Supplementary Material

**Figure S1:** perceived risk of vaporizer (ENDS) in a customer with stable coronary artery disease.

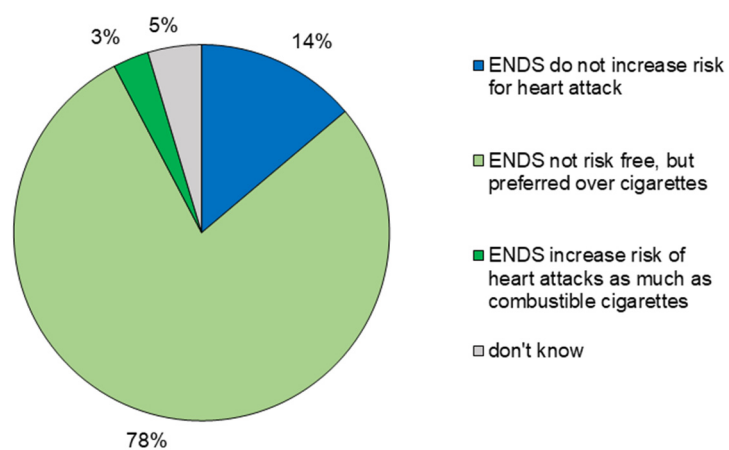

**Figure S2:** Box plot of perceived harmfulness of nicotine-containing products on a 0 – 9 scale. Abbreviations: HTP heated tobacco products; NRT nicotine replacement therapy; vaporizers/ENDS (electronic nicotine delivery system).

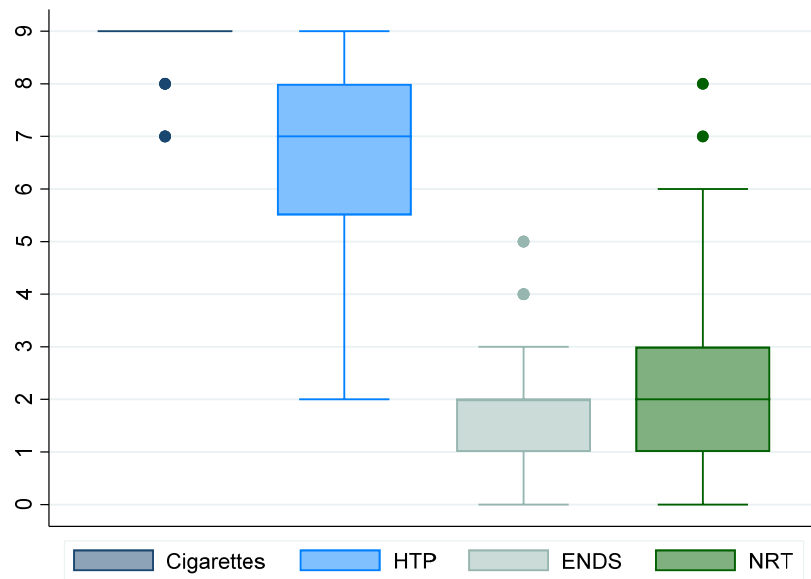

**Table S1:** Number of missing values for each variable with missing data.

| <i>Variable</i>                                                                                                | <i>Missing values</i> |
|----------------------------------------------------------------------------------------------------------------|-----------------------|
| Sex                                                                                                            | 3                     |
| Age                                                                                                            | 7                     |
| Education                                                                                                      | 6                     |
| Experience working in vape shop                                                                                | 3                     |
| Smoking/Vaping Status                                                                                          | 2                     |
| Role in shop                                                                                                   | 1                     |
| Selling Online                                                                                                 | 3                     |
| Selling Tobacco                                                                                                | 1                     |
| Nicotine concentration (vignette 1)                                                                            | 3                     |
| Vignette 2 (Asthma)                                                                                            | 2                     |
| Vignette 3.1 (What is your opinion about e-cigarettes that contain nicotine for persons after a heart attack?) | 3                     |
| Vignette 3.2 (What do you suggest to him?)                                                                     | 5                     |
| Interest in training                                                                                           | 2                     |
| Perceived harmfulness of nicotine containing products                                                          | 3                     |
